# Supplementary material for: Parkinsonian Syndromes in Motor Neuron Disease: A Clinical Study
Source: Front Aging Neurosci. 2022 Jun 27;14:917706. doi: 10.3389/fnagi.2022.917706 (PMC9271964; doi:10.3389/fnagi.2022.917706)
Supplement: Supplementary file 2 [file Table_1.XLSX]

## Sheet: Foglio1
Supplementary Table 1 - Detailed clinical, genetic, CSF and neuroimaging information of patients with MND-parkinsonism
ID	Gender	MND_onset_age	Park_onset_age	Family_history_neuro	MND_onset_site	MND_clinical_phen	MND_Survival_months	Cogwheel_rigidity	Tremor	Brady	Gait	Reduced_arm_swing	Retropuls	Ocular	Meyerson	Other	Levodopa_response	DaTScan	Age_at_DaTScan	Cognitive_features_onset	Cognitive_decline	Cognitive_features	Age_at_cog_eval	Other_clinical_features	MRI_features	Age_at_MRI	Lab_features	CSF_features	Age_at_LP	Genetic testing	Other_clinical_analyses
1	F	55.2	58.7726	Father with stroke	B	PLS	78.5333	UL asymmetric	N	mild at FT	Freezing and festination	N	Y	fragmented smooth pursuit	Y	hyposmia; hypomimia	Y	NA	NA	N	Y	mild memory deficit	NA	hypertension; dyslipidemia	moderate ischemic changes	NA	N	N	57.474	Sanger (SOD1, FUS, TARDBP), repeat primed PCR (c9orf72)
2	M	49.074	49.2466	Father and two paternal aunts with AD	S-LL	PLS	35.3333	UL asymmetric	N	N	Camptocormia	N	Y	N	N	left hand and foot dystonia, hypomimia	N	Normal	49.5808	N	Y	left upper limb ideomotor apraxia; executive dysfunction	51.0384	None	mild cortical atrophy	49.074	elevated CK and LDH	N	49.074	Sanger (SOD1, FUS, TARDBP), repeat primed PCR (c9orf72)	18FDG PET (2005): motor and premotor cortex hypometabolism
3	F	61.3616	62.9589	No	B	PLS	47.1	UL asymmetric	Postural tremor	N	N	N	N	upgaze and lateral limitation	Y	hypomimia	NA	NA	NA	NA	Y	mild cognitive decline with executive dyfunction; agraphia	62.9589	None	NA	NA	NA	NA	NA	Sanger (SOD1, FUS, TARDBP), repeat primed PCR (c9orf72)
4	F	77.6493	77.6493	Sibling with progressive dysarthria; father with progressive speech and gait disturbance	S-LL	PLS	36.0333	UL asymmetric	N	N	Unstable	Y	Y	upgaze limitation; slow saccades	N	N	NA	NA	NA	N	Y	frontal cognitive decline	80.9644	None	cortical-subcortical atrophy;	77.6493	N	NA	NA	NGS custom panel for ALS and parkinsonism-associated genes
5	M	76.4137	76.4137	Sibling with PSP-PLS; father with progressive speech and gait disturbance	B	PLS	76.9333	UL asymmetric	Rest tremor	Y	Wide based	Y	Y	vertical and horizontal gaze limitation; slow saccades; fragmented smooth pursuit	Y	N	NA	NA	NA	N	Y	phonetic errors in writing in anarthric patient; writing otherwise fluent	NA	None	NA	NA	N	N	NA	NGS custom panel for ALS and parkinsonism-associated genes
6	M	43.1781	43.3452	No	S-UL	PLS	25.4333	UL symmetric	N	Y	Trunk anteroflexion	Y	N	very slow saccades; gaze apraxia	Y	hypomimia	Poor	Abnormal; asymmetric reduction in basal ganglia	43.4301	N	N	N	44.5096	G6PDH deficiency	Normal findings	43.8411	N	normal tau and Abeta42; absent 14-3-3; basal CSF: normal	43.926	Clinical exome	18PET-FDG (12/2011): left putamen metabolism reduction; normal cortical metabolism; genetics: negative for SCA17; muscle biopsy: chronic neurogenic alterations
7	F	66.6219	69.6027	No	B	PLS	102.733	UL asymmetric	N	Y	N	N	Y	slow horizontal saccades; upgaze limitation	Y	hypomimia	Y	2014: normal, 2019: mild reduction right putamen	NA	N	N	N	68.6959	Hypertension	Mild cortical atrophy	68.6959	N	N	68.6411	Sanger (SOD1, FUS, TARDBP), repeat primed PCR (c9orf72)	MIBG SPECT negative.
8	M	80.1205	80.1205	No	S-LL	ALS-classic	38	UL and LL contralaterally	N	Y	trunk anteroflexion	Y	N	N	Y	hypomimia	Y	NA	NA	N	Y	subclinical frontal cogntive impairment (executive dysfunction)	NA	Hypertension; MGUS	Mild ischemic changes; mild global atrophy	81.211	Mild CK elevation; mild Vit.B12 deficiency	NA	NA	Clinical exome
9	M	70.7425	70.9918	Father with stroke	S-UL	ALS-classic	18.3333	All limbs asymmetric	N	Y	trunk anteroflexion; festination	N	N	fragmented smooth pursuit	Y	N	Y	mild left putaminal reduction	61.0603	N	Y	executive dysfunction; visuo-spatial memory dysfunction	71.1068	Major depressive episode at age 40. Dyslipidemia.	right cerebellar focal old ischemic lesion	71.1068	N	Normal tau, p-tau, Abeta42.	68.8	Whole exome sequencing
10	M	68.0932	61.9863	Son with MS	S-LL	ALS-classic	15.9333	UL asymmetric	Rest tremor	Y	Trunk anteroflexion	Y	Y	fragmented smooth pursuit; upgaze limitation; downward slow saccades	Y	hypomimia	Y	NA	NA	N	N	N	68.6	Diabetes, hypertension, dyslipidemia, chronic axonal polyneuropathy	Diffuse ischemic changes	68.6	N	N	68.6	Clinical exome
11	M	68.2932	67.863	Aunt and cousin with PD, sister with tremor	S-LL	ALS-flail leg	60.9667	UL asymmetric	Rest tremor	Y	Unable to stand	Unable to stand	Unable to stand	N	N	N	Poor	Bilateral reduction	NA	N	N	N	73.3863	Hypertension	Mildly ischemic changes; mild global atrophy	73.3863	NA	N	73.3863	Clinical exome
12	M	64.1836	61.1479	Uncle with PD	S-UL	ALS-flail arm	17.9333	All limbs asymmetric	Tremor	Y	Trunk anteroflexion	N	N	N	Y	N	Y	Abnormal	NA	N	N	N	NA	None	Normal findings	65.7945	CK mild elevation; vitB12 mild reduction	protein 50 mg/dL	65.7945	Sanger (SOD1, FUS, TARDBP), repeat primed PCR (c9orf72)	18FDG PET: left frontal/prefrontal metabolism reduction.
13	M	78.737	77.5562	Father with unspecified dementia; sibling with PD	B	ALS-B	NA	UL asymmetric	Rest tremor, asymmetric; kinetic tremor	Y	N	Y	Y	upgaze limitation	N	micrographia, hypomimia	Y	NA	NA	N	N	N	80.8603	Diabetes, hypertension	mild subcortical and pontine ischemic changes; moderate diffuse atrophy	80.8603	B12 mild reduction, low zync	N	80.7479	Sanger (SOD1, FUS, TARDBP), repeat primed PCR (c9orf72)
14	F	67.2361	64.4222	No	S-LL	classica	10.7333	UL asymmetric	Postural and kinetic tremor	Y	N	N	N	N	N	hypomimia	N	Abnormal; asymmetric	64	N	Y	globally normal but mild memory deficit	67	osteoporosis	mild global atrophy; iron deposition in SWI sequences in motor cortices	67	N	N	67	NGS custom panel for ALS and parkinsonism-associated genes
15	M	60.7781	66.4521	No	B	ALS-B	NA	UL symmetric	N	Y	N	Y	Y	fragmented smooth pursuit; slow horizontal saccades.	Y	N	NA	NA	NA	N	Y	globally normal but mild memory and frontal deficit	66.6877	None	Cortical atrophy	66.6877	N	oligoclonal bands reaction type 3	66.6548	Sanger (SOD1, FUS, TARDBP), repeat primed PCR (c9orf72)
16	F	75.874	75.874	No	S-LL	ALS-UMNp	6.66667	All limbs asymmetric	N	Y	N	N	N	fragmented smooth pursuit; slow saccades	Y	N	N	NA	NA	N	N	NA	NA	osteoporosis	moderate ischemic changes; cortical atrophy	75.874	N	NA	NA	Sanger (SOD1, FUS, TARDBP), repeat primed PCR (c9orf72)
17	F	61.8027	61.863	mother: depression and suicide; uncle: parkinsonism	S-UL	ALS-UMNp	25.3	All limbs	Intermittent right hand rest tremor	Y	N	Y	N	slow saccades in all directions	Y	hypomimia; left hand dystonia and apraxia	N	Normal	62.1151	N	Y	mild memory deficit; buccofacial apraxia	NA	COPD; osteoporosis	NA	NA	N	N; absent 14-3-3	62.5863	Clinical exome	HMPAO SPECT (2009): decreased global symmetric striatal and left cortical frontal fixation
18	F	65.7	63.1	No	S-UL	ALS-classic	62.4	LL asymmetric	N	Y	trunk anteroflexion; festination	Y	Y	ocular apraxia	Y	hypomimia; left hand apraxia	Initial	Bilateral asymmetric reduction	67.5	N	Y	frontal cognitive decline; ideomotor and buccofacial apraxia	67.1	COPD; type II diabetes; coronary artery disease	mild cortical frontoparietal atrophy	67.1	N	normal tau, p-tau, mild reduction of Abeta42 levels	67.1	Clinical exome	HMPAO SPECT (200): decreased fixation in left temporal and bilateral frontoposterior and striatal areas
